# Forced expression of fibroblast growth factor 21 reverses the sustained impairment of liver regeneration in hPPAR $\alpha$ <sup>PAC</sup> mice due to dysregulated bile acid synthesis

Hui-Xin Liu<sup>1</sup>, Ying Hu<sup>1</sup>, Samuel W. French<sup>2</sup>, Frank J. Gonzalez<sup>3</sup> and Yu-Jui Yvonne Wan<sup>1</sup>

<sup>1</sup> Department of Medical Pathology and Laboratory Medicine, University of California, Davis, Sacramento, CA, USA

<sup>2</sup> Department of Pathology & Laboratory Medicine, Harbor-UCLA Medical Center, Torrance, CA, USA

<sup>3</sup> Laboratory of Metabolism, National Cancer Institute, National Institutes of Health, Bethesda, MD, USA

**Correspondence to:** Yu-Jui Yvonne, **email:** yjywan@ucdavis.edu

**Keywords:** nuclear receptor, metabolism, proliferation, bile acid, species differences

**Received:** January 20, 2015

**Accepted:** February 17, 2015

**Published:** March 12, 2015

This is an open-access article distributed under the terms of the Creative Commons Attribution License, which permits unrestricted use, distribution, and reproduction in any medium, provided the original author and source are credited.

## ABSTRACT

**Peroxisome proliferator activated receptor  $\alpha$  (PPAR $\alpha$ ) stimulates hepatocellular proliferation is species-specific. Activation of mouse, but not human, PPAR $\alpha$  induces hepatocellular proliferation, hepatomegaly, and liver cancer. Here we tested the hypothesis that human and mouse PPAR $\alpha$  affects liver regeneration differentially. PPAR $\alpha$ -humanized mice (hPPAR $\alpha$ <sup>PAC</sup>) were similar to wild type mice in responding to fasting-induced PPAR $\alpha$  signaling. However, these mouse livers failed to regenerate in response to partial hepatectomy (PH). The liver-to-body weight ratios did not recover even 3 months after PH in hPPAR $\alpha$ <sup>PAC</sup>. The mouse PPAR $\alpha$ -mediated down-regulation of *let-7c* was absent in hPPAR $\alpha$ <sup>PAC</sup>, which might partially be responsible for impaired proliferation. After PH, hPPAR $\alpha$ <sup>PAC</sup> displayed steatosis, necrosis, and inflammation mainly in periportal zone 1, which suggested bile-induced toxicity. Quantification of hepatic bile acids (BA) revealed BA overload with increased hydrophobic BA in hPPAR $\alpha$ <sup>PAC</sup>. Forced FGF21 expression in partial hepatectomized hPPAR $\alpha$ <sup>PAC</sup> reduced hepatic steatosis, prevented focal necrosis, and restored liver mass. Compared to mouse PPAR $\alpha$ , human PPAR $\alpha$  has a reduced capacity to regulate metabolic pathways required for liver regeneration. In addition, FGF21 can compensate for the reduced ability of human PPAR $\alpha$  in stimulating liver regeneration, which suggests the potential application of FGF21 in promoting hepatic growth in injured and steatotic livers in humans.**

## INTRODUCTION

Active metabolism is required to generate energy and precursors for the biosynthesis of macromolecules used to produce cell or tissue mass to fully execute liver regeneration [1, 2]. A transient steatosis was noted in early phases of liver regeneration, and when this is disrupted, a delay in liver regeneration is noted, indicating that rapid accumulation of intracellular triglycerides may provide a crucial energy substrate for the regenerating liver [3]. Conversely, excessive accumulation of hepatic lipids is also linked to impaired liver regeneration, as demonstrated in humans as well as genetically-modified mouse models

of obesity [4, 5]. Thus, lipid homeostasis plays a role in modulating liver regeneration.

Due to the important function of peroxisome proliferator-activated receptors (PPAR) in regulating lipid homeostasis, the effects of PPAR $\alpha$ ,  $\beta$ , and  $\gamma$  on liver regeneration have been studied. Notably, PPAR $\beta$  regulates liver regeneration by modulating AKT and E2f signaling with PPAR $\beta$  deficiency delaying normal liver regeneration in mice [1]. Disruption of hepatic PPAR $\gamma$  expression in mice with diet-induced hepatic steatosis resulted in significant suppression of liver regeneration [2]. Lack of PPAR $\alpha$  also delays liver regeneration through suppression of cell cycle control, cytokine signaling, fat metabolism,

and impaired Ras signaling [6, 7].

PPAR $\alpha$  regulates not only lipid metabolism, but also cell proliferation, the latter of which is rodent specific [8]. Sustained activation of PPAR $\alpha$  induces hepatocyte proliferation and hepatocellular carcinomas in rodents [8]. However, humans are not susceptible to the hepatocarcinogenic effects of PPAR $\alpha$  agonists [8, 9]. It is unknown whether there exists a species difference in hepatocyte proliferation during liver regeneration. Although the strong hepatocyte proliferative effect of rodent PPAR $\alpha$  causes liver cancer, such effective proliferative effect may be beneficial for liver regeneration. Thus, the current study examined the species-specific role of PPAR $\alpha$  in liver regeneration by performing a 2/3 partial hepatectomy (PH) in wild-type (WT) and PPAR $\alpha$ -humanized (hPPAR $\alpha^{\text{PAC}}$ ) mice.

PPAR $\alpha$ -regulated pathways could be important in the control of liver regeneration. For example, PPAR $\alpha$  is a key regulator of hepatic fatty acid metabolism and can be activated by hypolipidemic drugs. Thus, activation of PPAR $\alpha$  signaling in hepatic steatotic patients prior to liver transplantation could potentially be beneficial [10]. Stimulation of PPAR $\alpha$  induces expression of fibroblast growth factor 21 (Fgf21), which encodes a cytokine essential for hepatic lipid oxidation and ketogenesis in the adaptive response to fasting conditions [11]. Administration of FGF21 exerts beneficial effects including reduction of adiposity, insulin resistance, dyslipidemia, and fatty liver [12, 13]. FGF21 has an effect in preventing lipopolysaccharide, acetaminophen, cerulein, and dioxin-induced toxicity and injury [11, 14-16]. Thus, it seems that PPAR $\alpha$ -activated-FGF21 may have a role in repairing an injured liver. PPAR $\alpha$  also regulates inflammatory pathways [10]. The IL-6-mediated STAT3 activation signaling, which is crucial for liver regeneration, is compromised in PPAR $\alpha$  knockout mice [6]. Moreover, PPAR $\alpha$  has a role in bile acid (BA) homeostasis [10]. Circulating blood BA levels increase after PH, and depletion of BAs decrease regeneration [17]. After PH, the remnant liver is exposed to a high flux of BAs, and regulation of BA homeostasis is essential for the normal progression of liver regeneration in rodents [17, 18]. In addition, lack of the BA receptor farnesoid x receptor (FXR) delays liver regeneration [17]. In humans, hepatocyte proliferation is commonly observed in biopsies of cholestatic livers [19]. Thus, PPAR $\alpha$ -regulated pathways including fatty acid and BA homeostasis as well as inflammatory signaling modulate liver regeneration. However, it is unknown whether there is a species difference in those PPAR $\alpha$ -regulated pathways during liver regeneration. The current study used hPPAR $\alpha^{\text{PAC}}$  to compare the role of human and mouse PPAR $\alpha$  in response to PH-induced liver regeneration.

## RESULTS

### Overnight fasting activates PPAR $\alpha$ target genes in both WT and hPPAR $\alpha^{\text{PAC}}$ mice

Fasting activates PPAR $\alpha$  downstream pathways in the mouse liver resulting in increased fatty acid catabolism [11]. Thus, hPPAR $\alpha^{\text{PAC}}$  mice were subjected to fasting to determine whether the fasting-induced PPAR $\alpha$  signaling activation is conserved with the human receptor. Overnight-fasting induced mRNAs encoded by the PPAR $\alpha$  target genes *Fgf21*, HMG-CoA synthase (*Hmgcs*) 1 and 2, acyl-CoA oxidase 1 (*Acox1*), cytochrome P450 4a10 (*Cyp4a10*), *Cyp4a14*, peroxisome proliferator-activated receptor co-activator protein 1 $\alpha$  (*Pgc1a*), and phosphoenolpyruvate carboxykinase (*Pepck*) in WT mice (Fig. 1). Fasting induced higher *Fgf21* (18 vs. 9.8) and lower *Hmgcs1* (2.8 vs. 4.3), *Cyp4a10* (12 vs. 27), and *Cyp4a14* (17 vs. 61) mRNA levels in hPPAR $\alpha^{\text{PAC}}$  than in WT mice, while fasting-induced *Hmgcs2*, *Acox1*, *Pgc1a*, and *Pepck* mRNA levels were comparable in the two mouse lines. These data indicate that human PPAR $\alpha$  has a functional response to fasting, which is consistent with published findings [8].

### Reduced liver growth in hPPAR $\alpha^{\text{PAC}}$ mice after PH

PH was performed in WT and hPPAR $\alpha^{\text{PAC}}$  mice, and livers were collected on 1 day up to 3 months post-surgery. The liver-to-body weight ratio of WT and hPPAR $\alpha^{\text{PAC}}$  mice

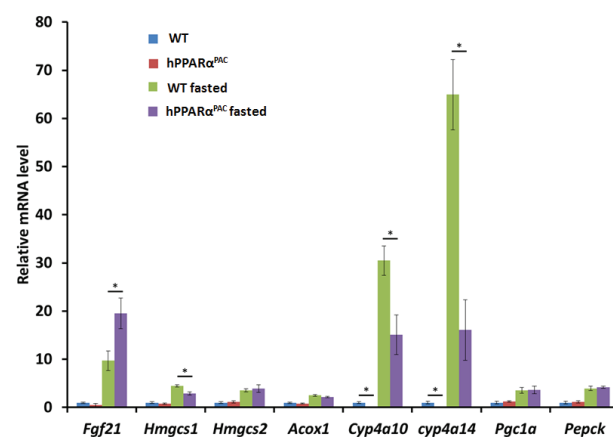

**Figure 1: Fasting activates mouse and human PPAR $\alpha$  target genes.** Wild type (WT) and PPAR $\alpha$ -humanized (hPPAR $\alpha^{\text{PAC}}$ ) mice were fasted overnight to activate PPAR $\alpha$  signaling. The expression of hepatic PPAR $\alpha$  target genes was studied by qPCR. Fasting induced all the PPAR $\alpha$  target genes including *Fgf21*, *Hmgcs1* and 2, *Acox1*, *Cyp4a10*, *Cyp4a14*, *Pgc1a*, and *Pepck* in both WT and hPPAR $\alpha^{\text{PAC}}$  mice. All values represent mean  $\pm$  standard deviation,  $n = 5$ ; \*  $p < 0.05$ , student's  $t$  test.

(without surgery) ranged from 4.2-4.5% and no statistical difference was found between the groups (data not shown). After PH, the liver-to-body weight ratio restored within 7 days in WT mice, whereas in hPPAR $\alpha^{PAC}$  mice, the liver-to-body weight ratios were reduced at all studied time points compared to WT controls. The liver-to-body weight ratio was 3.6% from 7 days to 3 months after PH in hPPAR $\alpha^{PAC}$  mice indicating that these mice failed to restore their original liver mass and normal liver regeneration was disrupted (Fig. 2A). WT livers, compared with hPPAR $\alpha^{PAC}$  livers, exhibited greater hepatocellular proliferation, as shown by increased numbers of Ki67-positive hepatocytes after PH (Fig. 2B). Hematoxylin and eosin (H&E) staining revealed transient accumulation of hepatic lipids in WT mice 1.5 days after PH, which is likely essential for liver regeneration [3]. Two days after PH, lipid accumulation was diminished in WT livers (Fig. 2C). Representative images of hPPAR $\alpha^{PAC}$  liver sections harvested 1.5 and 2 days post-PH indicate that hPPAR $\alpha^{PAC}$  mice had lipid

deposition (Fig. 2C). hPPAR $\alpha^{PAC}$  mice also showed 3 to 7-fold increase in hepatic triglyceride levels 1.5 and 2 days after PH (Fig. 2C). Furthermore, the increased cell proliferation found in WT mice 1.5-2 day after PH were accompanied by higher expression levels of proliferating cell nuclear antigen (*Pcna*), *Cyclin A*, *Cyclin B*/Cyclin-dependent kinase (*Cdk*) 1 complex, *Cyclin D*/Cdk6 complex, and *Cyclin E* mRNAs (Fig. 3A-G). However, such inductions were delayed and reduced in hPPAR $\alpha^{PAC}$  mouse livers. Moreover, Western blots indicated that CYCLIN D and E proteins were induced after PH in WT mouse livers, but not in hPPAR $\alpha^{PAC}$  livers (Fig. 3H). In addition, the expression of PPAR $\alpha$  target *let-7c*, which promotes cell cycle arrest by targeting *c-Myc* mRNA [20], was studied to compare the differences between mouse and human PPAR $\alpha$  in regulating liver regeneration. A temporal pattern of down-regulated *let-7c* was observed in regenerating WT mice. At most studied time points, except 3 days after PH, *let-7c* levels were higher in hPPAR $\alpha^{PAC}$

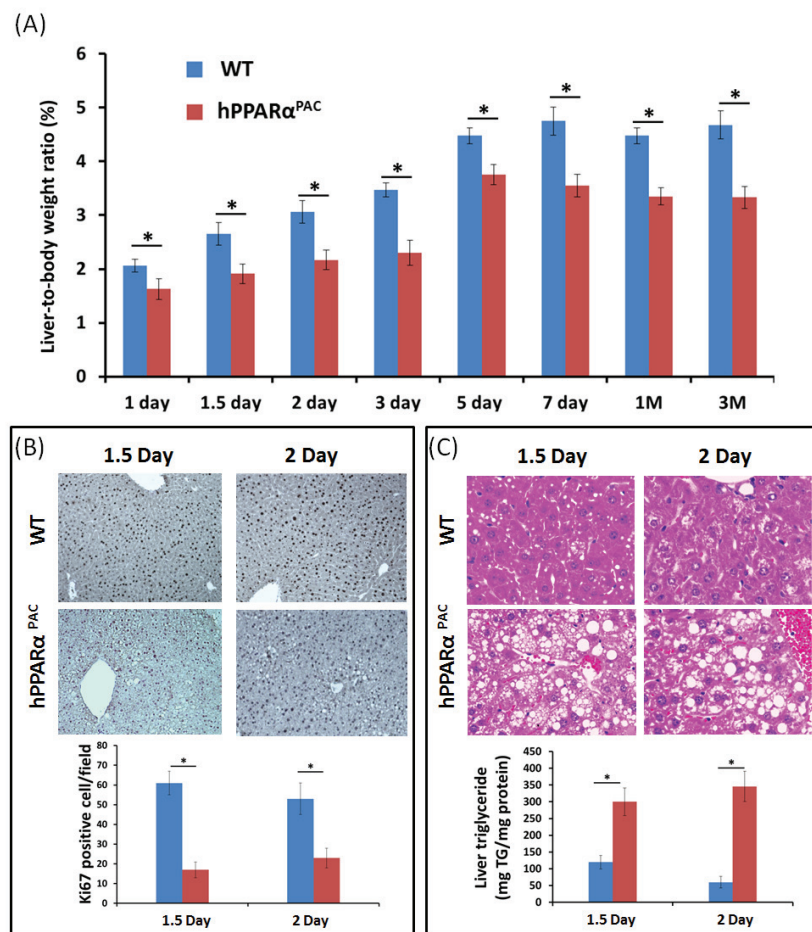

**Figure 2: PH-induced liver growth is suppressed in hPPAR $\alpha^{PAC}$  mice.** Wild type (WT) and PPAR $\alpha$ -humanized (hPPAR $\alpha^{PAC}$ ) mice were subjected to PH and killed 0 day to 3 months after surgery. Liver-to-body weight ratios were recorded. The data indicated that liver regeneration was not completed in hPPAR $\alpha^{PAC}$  mice 3 months after the surgery (A). Representative Ki67 staining (10 $\times$ ) of mouse livers after PH. The number of proliferative cells was significantly less in hPPAR $\alpha^{PAC}$  than WT mice (B). Representative images of H&E staining (40 $\times$ ) of liver sections of mice that received PH indicated that hPPAR $\alpha^{PAC}$  mice had fat deposition. Hepatic triglyceride levels 1.5 and 2 days after PH indicated elevated triglyceride in hPPAR $\alpha^{PAC}$  livers after PH (C). All values represent mean  $\pm$  standard deviation,  $n = 5$ ; \* $p < 0.05$ , student's  $t$  test.

than WT mouse livers (Fig. 4A). Accordingly, *c-Myc* mRNA levels were lower in hPPAR $\alpha$ <sup>PAC</sup> than WT mouse livers 1, 2, and 5 days after PH (Fig. 4B).

### Diminished FGF21 expression and its downstream lipid homeostasis target genes in hPPAR $\alpha$ <sup>PAC</sup> mouse livers after PH

FGF21 plays a key role in regulating fatty acid oxidation, triglyceride clearance, and ketogenesis in the liver [11]. *Fgf21* mRNA level was induced and peaked in WT mice 1 day after PH. In contrast, *Fgf21* mRNA was not detected in hPPAR $\alpha$ <sup>PAC</sup> mouse livers after PH (Fig. 5A). Consistent finding was noted at the protein level (Fig. 5B). In addition, the induction of CYP4A14 protein was observed in WT mice, but not detectable in hPPAR $\alpha$ <sup>PAC</sup> livers after PH (Fig. 3B). Moreover, the binding of PPAR $\alpha$  in the promoter region of the *Fgf21* gene was enriched in WT mouse regenerating livers, but not in hPPAR $\alpha$ <sup>PAC</sup> mice as demonstrated by ChIP-qPCR (Fig. 5C). FGF21 induces PGC1 $\alpha$  and its target genes in response to starvation [21].

To further assess the role of FGF21 in liver regeneration, the expression of FGF21 target genes involved in lipid homeostasis (*Pgcl1*, *Acox1*, *Cpt1*, *Cyp4a14*, *Cyp4a10*, *Pepck*) was studied (Fig. 5D-I). In WT mice, the induction of these mRNAs correlated with the observed induction of *Fgf21* mRNA 1 day post-PH. There was no induction of the aforementioned genes in hPPAR $\alpha$ <sup>PAC</sup> livers up to 7 days after PH. *Cyp4a10* and *Cyp4a14* mRNA was not detectable in hPPAR $\alpha$ <sup>PAC</sup> mouse livers.

### Liver pathology

hPPAR $\alpha$ <sup>PAC</sup> mouse livers had pathological features of vacuolation and focal necrosis 3 hours post-PH. Steatosis, dilate bile duct, dilated lymphatic, and duct metaplasia with periportal fibrosis were noted 2 days after PH. Interface hepatitis where lymphocytes invaded from the portal tract and mild steatohepatitis were notice from 7 days and 3 months post-PH (Fig. 6). These morphological features indicated zone 1 periportal injury. The post-PH injury observed in hPPAR $\alpha$ <sup>PAC</sup> mice suggested bile-induced toxicity [18], thus, hepatic BAs were quantified.

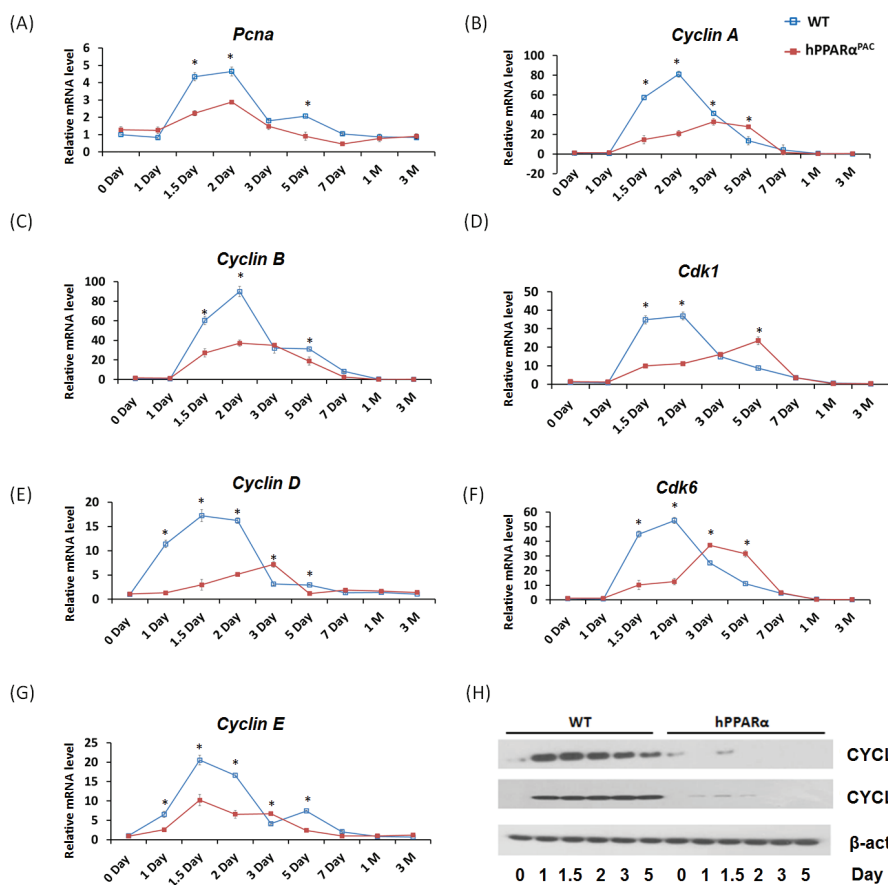

**Figure 3: The induction of hepatic cell cycle genes is diminished in hPPAR $\alpha$ <sup>PAC</sup> mice after PH.** Experiments were performed based on the description in Figure legend 2. Hepatic gene expression of *PcnA*, *Cyclin A*, *Cyclin B/Cdk1*, *Cyclin D/Cdk6*, and *Cyclin E* was studied by qPCR in WT and hPPAR $\alpha$ <sup>PAC</sup> mouse livers after PH (A-G). Western blot analysis of CYCLIN D and E protein levels in WT and hPPAR $\alpha$ <sup>PAC</sup> livers after PH (H). All values represent mean  $\pm$  standard deviation,  $n = 5$ ; \*  $p < 0.05$ , student's  $t$  test.

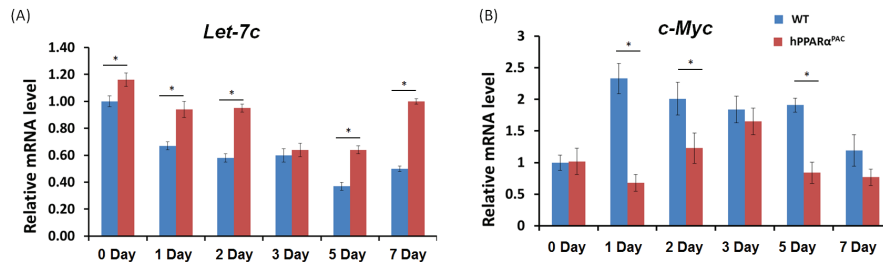

**Figure 4: Hepatic expression levels of *let-7c* miRNA and *c-Myc* mRNA in WT and hPPAR $\alpha^{PAC}$  mice after PH.** Experiments were performed based on the description in Figure legend 2. The expression of *let-7c* (A) and *c-Myc* (B) was studied by qPCR. A significantly higher expression of *let-7c* was found in hPPAR $\alpha^{PAC}$  mice at basal level compared with that in WT mice. After PH, the expression of *let-7c* decreased in both genotypes of mice. However, the decreased levels were significantly less in hPPAR $\alpha^{PAC}$  than WT mice in most studied time points. Accordingly, higher induction of *c-Myc* mRNA at day 1, 2, and 5 was found in WT than hPPAR $\alpha^{PAC}$  livers. All values represent mean  $\pm$  standard deviation,  $n = 5$ ; \* $p < 0.05$ , student's  $t$  test.

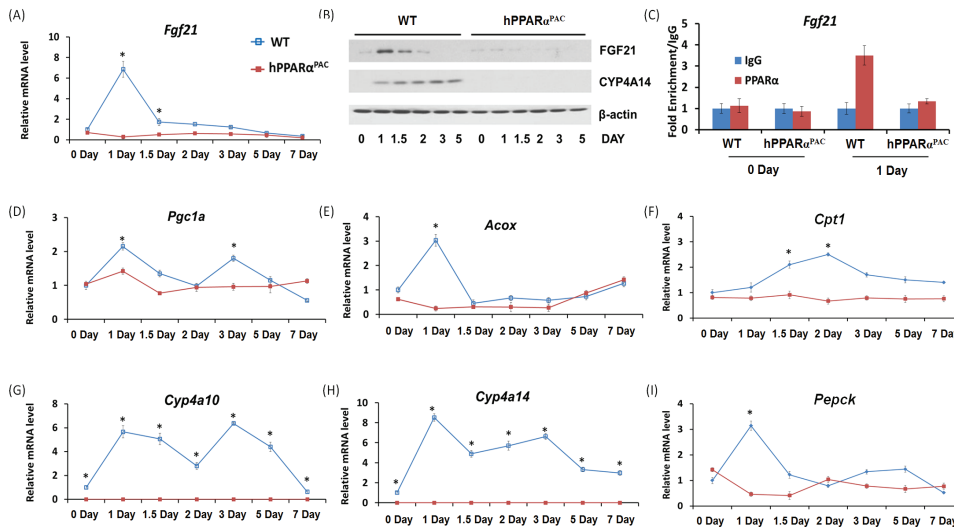

**Figure 5: The induction of PPAR $\alpha$  target FGF21 is diminished in PPAR $\alpha$ -humanized mice after PH.** Experiments were performed based on the description in Figure legend 2. PH was performed in WT and hPPAR $\alpha^{PAC}$  mice and hepatic gene expression of *Fgf21* was studied using qPCR (A). Western blot analysis indicated that FGF21 protein level peaked 1 day after PH in WT livers, but not in hPPAR $\alpha^{PAC}$ . The induction of CYP4A14 was found in WT mice after PH, but such induction was absent in hPPAR $\alpha^{PAC}$  livers after PH (B). Chromatin immunoprecipitation assays were performed using liver tissues ( $n=3$ ) from WT and hPPAR $\alpha^{PAC}$  mice 0 and 1 day after PH with either PPAR $\alpha$  or negative control IgG. The purified DNA fragments were amplified using primers specific for the *Fgf21* promoter (C). PH was performed in WT and hPPAR $\alpha^{PAC}$  mice and hepatic gene expression of *Pgc1a*, *Acox*, *Cpt1*, *Cyp4a10*, *Cyp4a14* and *Pepck* were studied using qPCR (D-I). All values represent mean  $\pm$  standard deviation,  $n = 5$ ; \* $p < 0.05$ , student's  $t$  test.

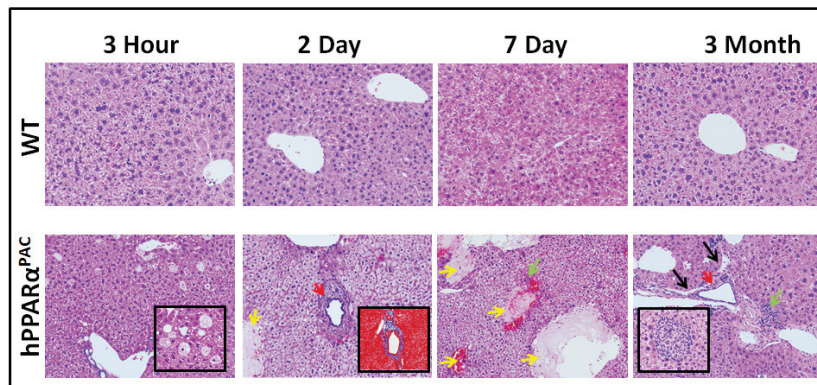

**Figure 6: Liver injury in regenerating hPPAR $\alpha^{PAC}$  mice.** Experiments were performed based on the description in Figure legend 2. Representative images of H&E staining (10 $\times$ ) of liver sections of mice that received PH indicated that WT had normal histology post-surgery, but regenerating hPPAR $\alpha^{PAC}$  mice had zone 1 periportal injury. Focal necrosis indicated by yellow arrows; dilated bile duct indicated by red arrows; dilated lymphatic indicated by black arrows; interface hepatitis indicated by green arrows. Inserts show liver injury in greater detail including vacuolation and focal necrosis of hepatocytes (3 hours, 40 $\times$ ), periportal fibrosis (Masson's trichrome staining, 10 $\times$ , 2 days), and interface hepatitis (3 months, 40 $\times$ ) in hPPAR $\alpha^{PAC}$  mice.

It is important to note that the injury was not due to surgery itself because none of WT mice had liver pathology after the surgery.

### Quantification of hepatic BA and study the expression of genes regulate BA homeostasis

The basal hepatic total bile acid (TBA) level was similar between WT and hPPAR $\alpha$ <sup>PAC</sup> mice, but the composition of BA was different (Fig. 7A, B). The levels of primary BAs including CA, CDCA, MCA, UDCA were higher in WT than hPPAR $\alpha$ <sup>PAC</sup> mice (Fig. 7A). After PH, TBA level was transiently increased within 3 hours of PH and returned to the basal level 1 day later (Fig. 7B). In contrast to WT mice, sustained increase in TBA was noted in hPPAR $\alpha$ <sup>PAC</sup> mice post-PH (Fig. 7B). The ratio of CA to CDCA, frequently found to be higher in patients who have inflammation or cholestasis [22,23], was calculated during liver regeneration in both genotypes. The CA/CDCA ratio substantially increased in regenerating hPPAR $\alpha$ <sup>PAC</sup> mice (Fig. 7C). The MCA/CA ratio was lower in hPPAR $\alpha$ <sup>PAC</sup> than WT mice also suggested increased hydrophobicity

after PH in hPPAR $\alpha$ <sup>PAC</sup> mice (Fig. 7D) [18]. The increased ratio of TCA to TCDCA, which has been implicated in CCl<sub>4</sub>-induced acute liver injury in mice [24], was also calculated, and the ratio was higher in hPPAR $\alpha$ <sup>PAC</sup> than WT mice 1, 2, 3, and 7 days post-PH (Fig. 7E).

The expressions of genes encoding proteins that regulate BA homeostasis were then examined. Before PH, hPPAR $\alpha$ <sup>PAC</sup> mice had higher mRNA levels of solute carrier family 10 member 1 (*Ntcp*), and organic solute transporter beta (*Ostb*), but similar mRNA levels of *Bsep* and *Cyp7a1/8b1/27a1*, as compared to WT mice (Fig. 8A-C). In addition, small heterodimer partner (*Shp*) mRNA level was more than two folds higher in hPPAR $\alpha$ <sup>PAC</sup> mice compared to WT mice (data not shown). After PH, the mRNA levels of *Cyp7a1/8b1/27a1* were suppressed in both genotypes. However the mRNA levels of *Cyp7a1/8b1* were barely detectable in hPPAR $\alpha$ <sup>PAC</sup> 1-2 day after PH (Fig. 8A, B). The mRNA levels of *Ntcp* and *Bsep* showed similar expression profile in both genotypes, but levels were lower in hPPAR $\alpha$ <sup>PAC</sup> than WT mice 2 days post-PH (Fig. 8D-E). Moreover, *Ostb* mRNA level was robustly induced by 62-127 fold in hPPAR $\alpha$ <sup>PAC</sup> mice compared with 2-7 fold induction in WT mice post-PH (Fig. 8F).

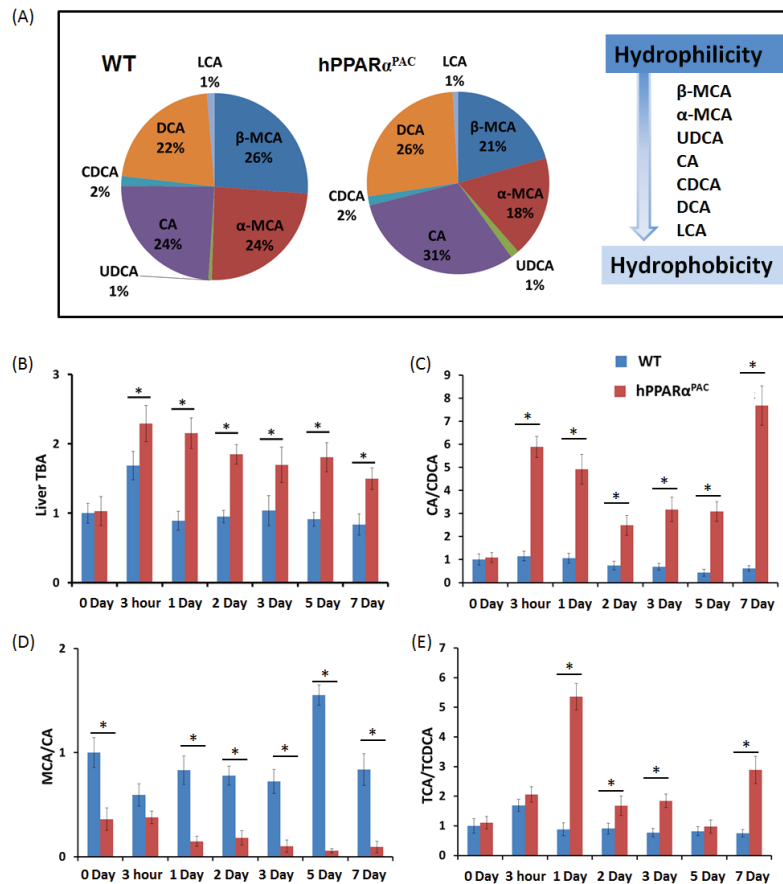

**Figure 7: Dysregulated bile acid homeostasis in regenerating hPPAR $\alpha$ <sup>PAC</sup> mice.** Experiments were performed based on the description in Figure legend 2. Quantification of individual hepatic BAs in WT and hPPAR $\alpha$ <sup>PAC</sup> before surgery (A), and calculated TBA, CA/CDCA, MCA/CA, and TCA/TCDCA ratios from livers that received PH on the basis of mass spectrometry analysis (B-E). All values represent mean  $\pm$  standard deviation,  $n = 5$ .

## Dysregulation of inflammatory and fibrotic genes in hPPAR $\alpha$ <sup>PAC</sup> livers after PH

Inflammatory signaling and fibrotic response were studied due to the occurring pathology in hPPAR $\alpha$ <sup>PAC</sup> mice. The nuclear factor erythroid 2-related factor (*Nrf2*) was studied for its protective function against oxidative stress. During normal liver regeneration, *Nrf2* was induced and peaked 2 days after PH in WT mice. The induction of *Nrf2* was absent in hPPAR $\alpha$ <sup>PAC</sup> mice during the first 2 days after PH, indicating impaired regulation of anti-oxidative stress

by human PPAR $\alpha$  (Fig. 9A). Pro-inflammatory genes including interleukin 6 (*Il-6*), and membrane cofactor protein 1 (*Mcp1*) were highly induced in hPPAR $\alpha$ <sup>PAC</sup> mice 1.5 days post-PH in comparison with WT counterparts (Fig. 9B-C). The expression levels of cytokeratin-19 (*Ck19*), which typically expressed in hepatobiliary tracts, were minimally changed in WT, but markedly elevated in the hPPAR $\alpha$ <sup>PAC</sup> mice post-PH. The expression levels of fibrosis marker  $\alpha$ -smooth muscle actin ( *$\alpha$ Sma*) and collagen type I,  $\alpha$  1 (*Coll1a1*) also showed higher induction in hPPAR $\alpha$ <sup>PAC</sup> than WT mice after PH (Fig. 9E-F).

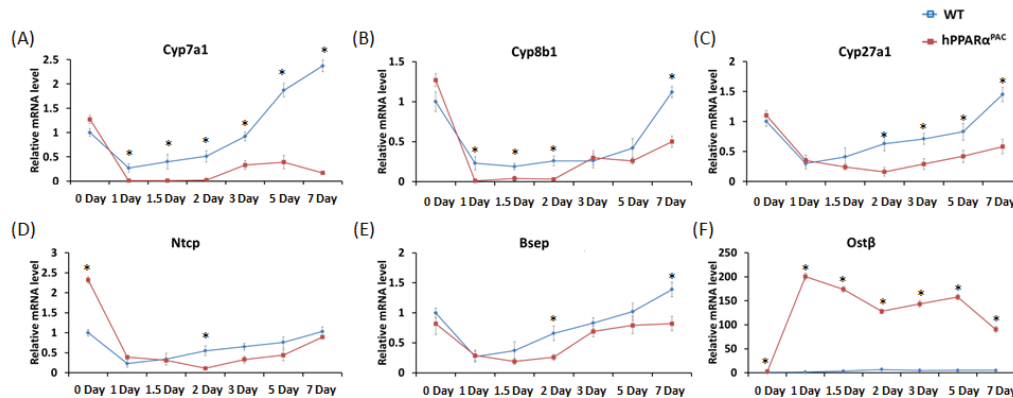

**Figure 8: Dysregulated expression of genes involved in bile acid homeostasis in regenerating hPPAR $\alpha$ <sup>PAC</sup> mice.** Experiments were performed based on the description in Figure legend 2. Hepatic gene expression of *Cyp7a1*, *Cyp8b1*, *Cyp27a1*, *Ntcp*, *Bsep*, and *Ostb*, were studied using real-time PCR in regenerating WT and hPPAR $\alpha$ <sup>PAC</sup> mouse livers (A-F). All values represent mean  $\pm$  standard deviation,  $n = 5$ ; \* $p < 0.05$ , student's  $t$  test.

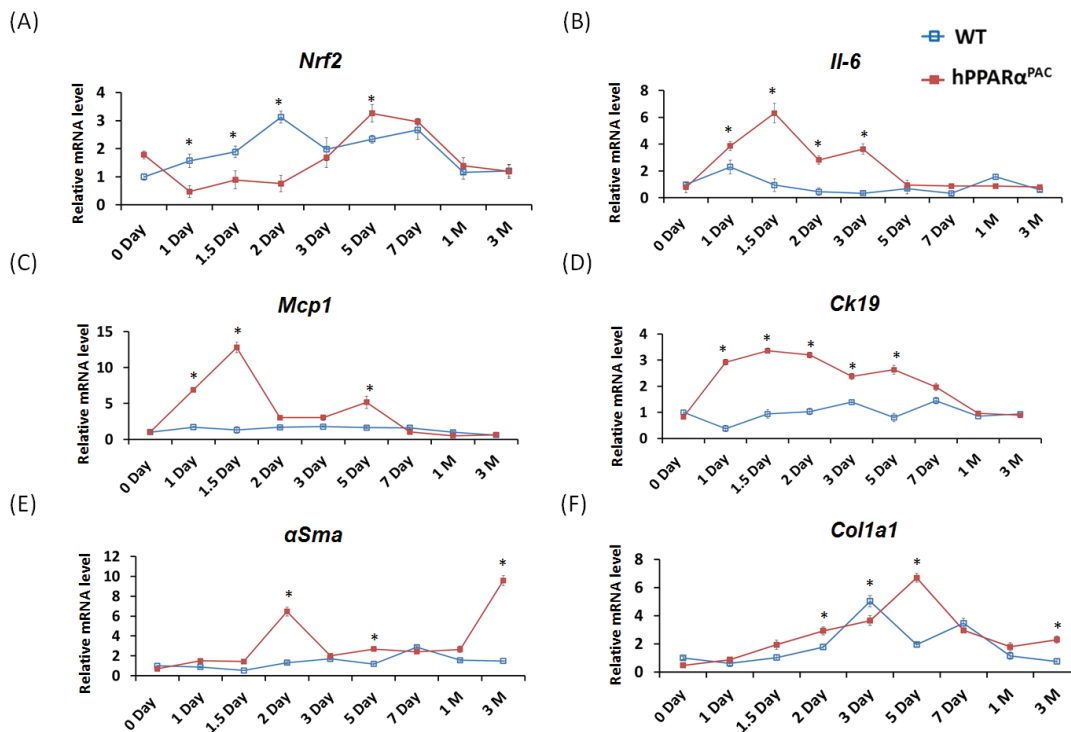

**Figure 9: The expression profiles of hepatic genes.** Experiment was performed based on the description in Figure legend 2. Hepatic gene expression of *Nrf2*, *IL-6*, *MCPI*, *CK19*,  *$\alpha$ Sma* and *Coll1a1* were studied using real-time PCR in regenerating WT and hPPAR $\alpha$ <sup>PAC</sup> mouse livers (A-F). All values represent mean  $\pm$  standard deviation,  $n = 5$ ; \* $p < 0.05$ , student's  $t$  test.

## Adenoviral Fgf21 infusion rescues liver regeneration in hPPAR $\alpha$ <sup>PAC</sup> mice

In response to fasting, the induction of FGF21 was greater in hPPAR $\alpha$ <sup>PAC</sup> than WT mice (Fig. 1). However, in response to liver resection, FGF21 mRNA and protein (Fig. 5) and its downstream targets that regulate lipid homeostasis (Fig. 5) were not induced in hPPAR $\alpha$ <sup>PAC</sup> mouse livers. These differences point to potential species differences in human and mouse PPAR $\alpha$  signaling on the FGF21 metabolic pathway in the context of liver regeneration. An adenoviral vector expressing mouse Fgf21 (Ad-Fgf21) was used to express FGF21 in hPPAR $\alpha$ <sup>PAC</sup> mouse livers. This construct produced significant expression of FGF21 protein within 1 day after the injection (Fig. 10A). hPPAR $\alpha$ <sup>PAC</sup> mice infused with FGF21 had similar liver-to-body weight ratios as the WT mice during the course of liver regeneration (Fig. 10B). In addition, Ad-Fgf21-injected hPPAR $\alpha$ <sup>PAC</sup> mice no longer had steatosis and focal necrosis (Fig. 10C-D). Moreover, they displayed increased expression of Fgf21, which was sustained 7 days post-PH (Fig. 11A). Forced FGF21 expression also restored the *Let-7c/c-Myc* pathway 1-2 days post-PH in hPPAR $\alpha$ <sup>PAC</sup> mouse livers (Fig. 11B, C). In addition, expression of FGF21 in hPPAR $\alpha$ <sup>PAC</sup> mice led to the coordinated up-regulation of *Cyclin A*, *Cyclin B/Cdk1* complex, *Cyclin E*, and *Cyclin D/Cdk6* complex (Fig. 11D-I).

Forced FGF21 expression reduced the mRNA levels of *Tnfa*, *Il-6*, and *Mcp1* in hPPAR $\alpha$ <sup>PAC</sup> mouse livers that had PH (Fig. 12). Consistent with the phenotype, forced FGF21 expression also induced the expression of *Pgc1a*, *Cpt1*, *Cyp4a10*, *Cyp4a14*, and *Pepck* genes suggesting normalization of lipid homeostasis in hPPAR $\alpha$ <sup>PAC</sup> mice (Fig. 13). BA quantification showed normalized hepatic TBA, MCA/CA, CA/CDCA, and TCA/TCDC values in hPPAR $\alpha$ <sup>PAC</sup> mouse livers with Ad-Fgf21 infusion (Fig. 14).

## DISCUSSION

The current study demonstrated that hPPAR $\alpha$ <sup>PAC</sup> mice exhibit reduced hepatocyte proliferative capability during liver regeneration in comparison with WT mice. The presented data showed that human PPAR $\alpha$ -mediated signaling that controls liver regeneration was less effective than that of mouse PPAR $\alpha$ . PH caused persistent steatosis, inflammation, and necrosis, which was associated with dysregulated lipid and BA homeostasis in hPPAR $\alpha$ <sup>PAC</sup> mice. Thus, in response to liver regeneration, hPPAR $\alpha$  is not as effective as mouse PPAR $\alpha$  in regulating lipid metabolism as well as hepatocyte proliferation. Metabolism, which is mainly controlled by the liver, is about 7 times faster in mice than humans [25]. Liver regeneration, which can be completed within 7-10 days in mice, takes about 60-90 days to complete in humans [26]. Thus, it seems that the

metabolic rate and proliferative capability are correlated, and that the species difference of PPAR $\alpha$  may account for such difference. Because overexpression of FGF21 could restore the normal progression of liver regeneration in hPPAR $\alpha$ <sup>PAC</sup> mice, FGF21 appears to not only repair injury, but also compensate for the reduced ability of human PPAR $\alpha$  to hasten liver regeneration. These findings suggest that FGF21 infusion would be of therapeutic value to improve the outcome of liver transplantation and liver disease in humans.

The hPPAR $\alpha$ <sup>PAC</sup> mice used in the current study were generated with a P1 phage artificial chromosome clone containing the complete human PPAR $\alpha$  gene including the 5' and 3' flanking sequences [8]. Thus, the strategy used allowed the WT and hPPAR $\alpha$ <sup>PAC</sup> mice to have the same PPAR $\alpha$  tissue distribution pattern, and the levels of PPAR $\alpha$  are comparable in liver, brown adipose tissue, kidney, heart, intestine, lung, etc. [8]. Moreover, hPPAR $\alpha$ <sup>PAC</sup> and WT mice respond to fasting as well as fenofibrate in a similar manner, which include peroxisome proliferation, reduction of serum triglycerides, and induction of genes encoding enzymes involved in fatty acid metabolism in liver, kidney, and heart. Thus, the observed difference was not due to differential tissue distribution pattern or difference in expression level.

Published data suggested that the species difference of PPAR $\alpha$  might be due to human livers having 10-fold lower PPAR $\alpha$  expression level compared to mouse livers [27]. However, others showed that the level of PPAR $\alpha$  mRNA was similar between human and mouse livers as well as primary hepatocytes [28]. It is important to note that PPAR $\alpha$  is regulated by the circadian cycle [29]. Thus, it is difficult to compare the expression level of PPAR $\alpha$  in human livers without knowing the time of liver harvesting and the expression at the protein level. Microarray data showed that activation of PPAR $\alpha$  regulates a mostly divergent set of genes in mouse and human hepatocytes although the key role of PPAR $\alpha$  as the master regulator of hepatic lipid metabolism is generally well-conserved between mouse and human [8]. Consistently, the data presented in current study showed that PPAR $\alpha$  target genes, such as Fgf21, can be induced to different levels depending on the challenges and species. In response to fasting, human PPAR $\alpha$ -induced Fgf21 was higher than mouse PPAR $\alpha$ , whereas in response to liver resection, human PPAR $\alpha$  was not able to induce Fgf21 at all. The binding data indicated that the lack of induction of FGF21 was associated with lack of PPAR $\alpha$  binding to the Fgf21 gene in hPPAR $\alpha$ <sup>PAC</sup> mice after PH. Such differences might be due to the presence of different endogenous ligands, which have different binding affinity to human and mouse PPAR $\alpha$ , in response to the specific challenges.

FGF21 is a hepatokine that acts as a global starvation signal. As a key metabolic regulator, FGF21 controls glucose and lipid homeostasis [30-33]. Therapeutic administration of recombinant FGF21 exerts



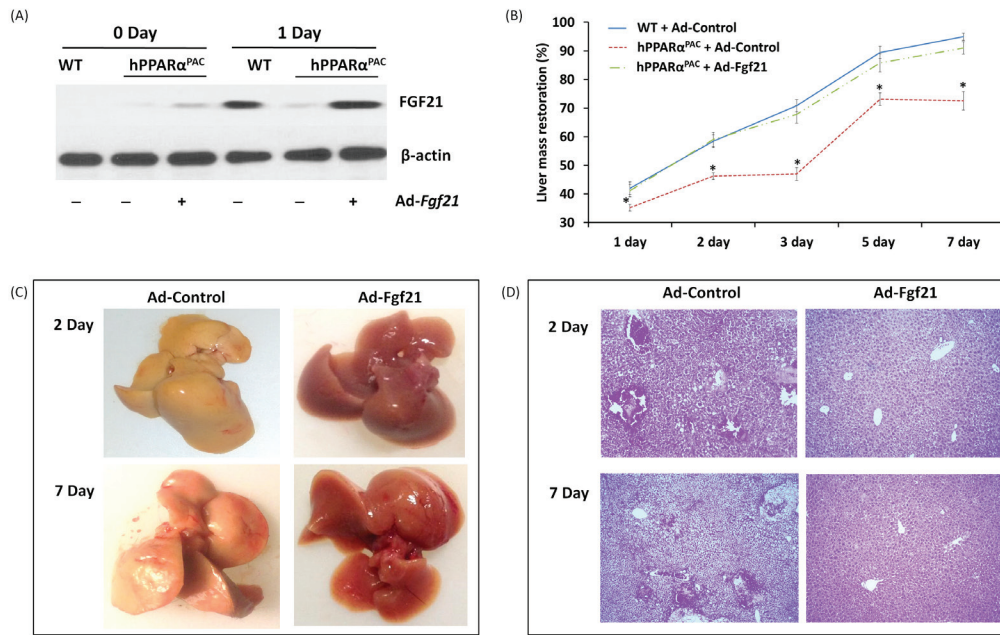

**Figure 10: Adenoviral delivery of Fgf21 reversed the impaired liver regeneration in hPPAR $\alpha^{\text{PAC}}$  mice.** Adenovirus-mediated expression of FGF21 in hPPAR $\alpha^{\text{PAC}}$  mouse livers was accomplished via tail vein injection of Ad-Fgf21 or control vector (Ad-Control) followed by PH surgery. Western blot analysis revealed restoration of FGF21 protein levels in hPPAR $\alpha^{\text{PAC}}$  mice was similar to that in WT (A). Liver-to-body weight ratios were recorded (B). Representative images of hPPAR $\alpha^{\text{PAC}}$  livers with Ad-control or Ad-Fgf21 injection harvested 2 and 7 days after PH (C). Representative images of H&E staining (10 $\times$ ) of hPPAR $\alpha^{\text{PAC}}$  liver sections with and without Ad-Fgf21 injection harvested 2 and 7 days after PH (D). All values represent mean  $\pm$  standard deviation,  $n = 5$ ; \*  $p < 0.05$ , student's  $t$  test, hPPAR $\alpha^{\text{PAC}}$  with Ad-control vs WT with Ad-Control.

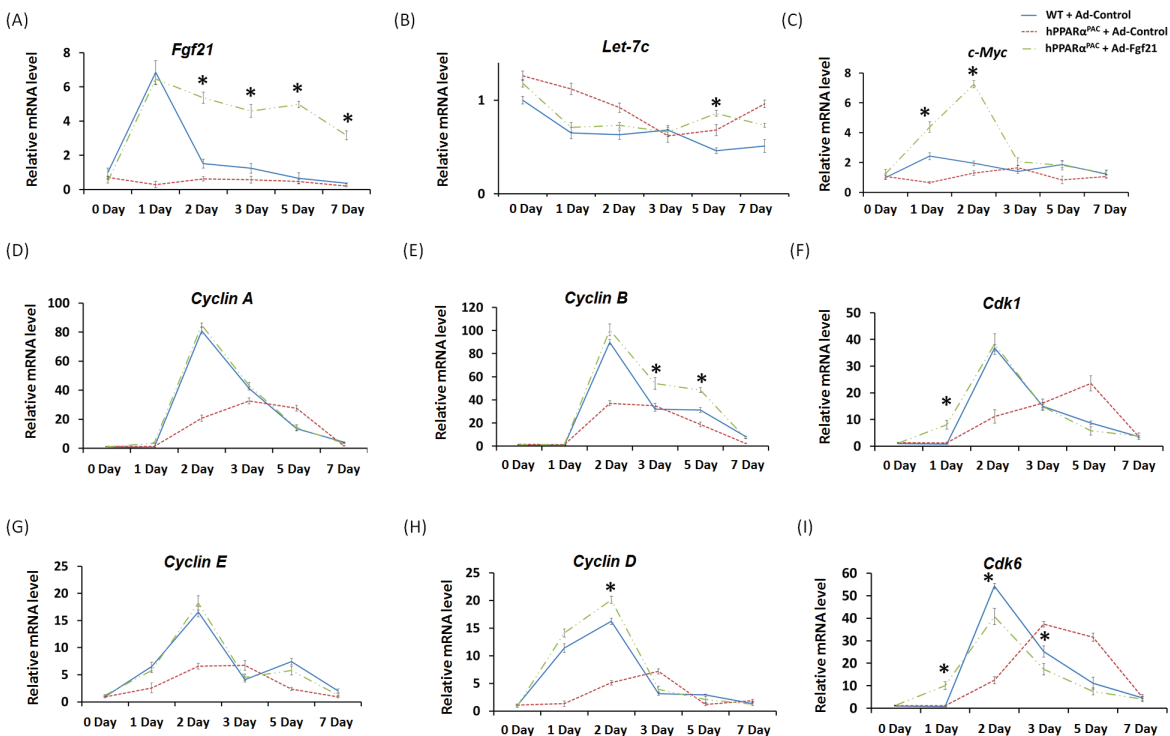

**Figure 11: Adenoviral delivery of Fgf21 reversed the impaired cell cycle gene expressions in regenerating hPPAR $\alpha^{\text{PAC}}$  mice.** Experiment was performed based on the description in Figure legend 10. Hepatic gene expression of *Fgf21*, *let-7c*, *c-Myc*, and cell cycle genes including *Cyclin A*, *B*, *D*, *E* as well as *Cdk1*, and *Cdk6* were studied using real-time PCR in regenerating WT mice, hPPAR $\alpha^{\text{PAC}}$  mice, and hPPAR $\alpha^{\text{PAC}}$  mice with Ad-Fgf21 injection (A-I). All values represent mean  $\pm$  standard deviation,  $n = 5$ ; \*  $p < 0.05$ , student's  $t$  test, hPPAR $\alpha^{\text{PAC}}$  with Ad-Fgf21 vs WT with Ad-Control.

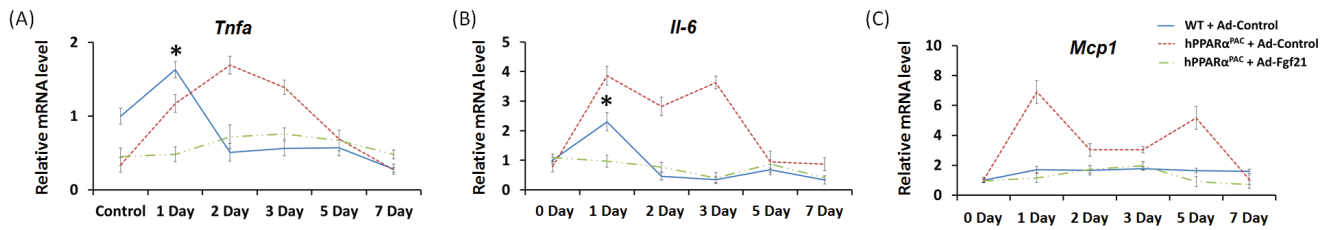

**Figure 12: Adenoviral delivery of Fgf21 reversed the dysregulated expression of genes that are involved in pro-inflammation in regenerating hPPAR $\alpha$ <sup>PAC</sup> mice.** Experiment was performed based on the description in Figure legend 10. Hepatic gene expression of pro-inflammation genes (*Tnfa*, *Il-6*, *Mcp1*) were studied using real-time PCR in regenerating WT mice and hPPAR $\alpha$ <sup>PAC</sup> mice with Ad-Control, and hPPAR $\alpha$ <sup>PAC</sup> mice with Ad-Fgf21 injection (A-C). All values represent mean  $\pm$  standard deviation,  $n = 5$ ; \*  $p < 0.05$ , student's  $t$  test, hPPAR $\alpha$ <sup>PAC</sup> with Ad-Fgf21 vs WT with Ad-Control.

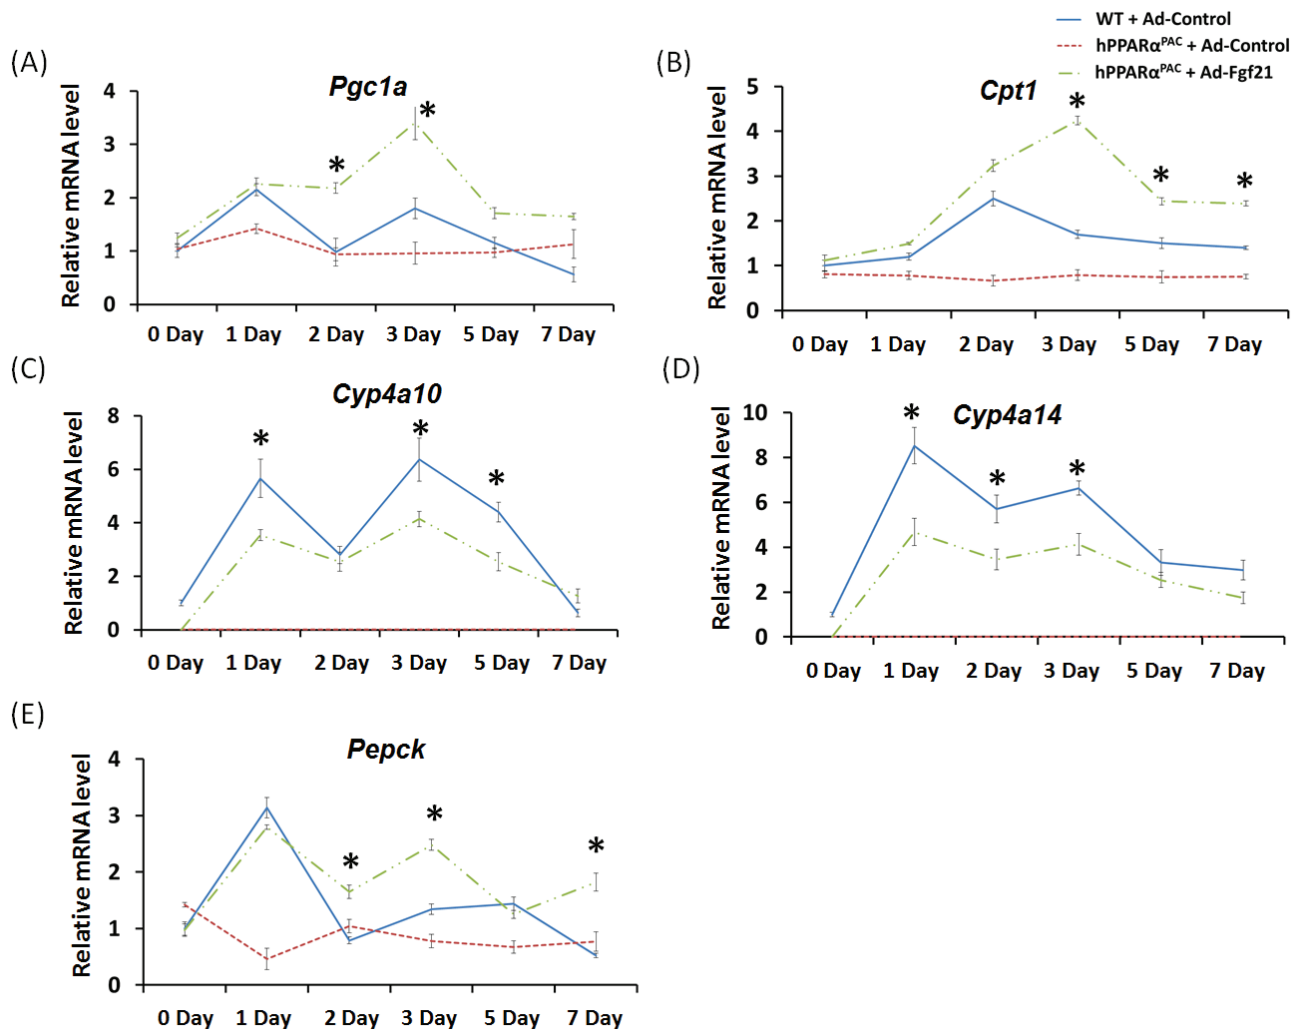

**Figure 13: Adenoviral delivery of Fgf21 reversed the dysregulated expression of genes that are involved in lipid homeostasis in regenerating hPPAR $\alpha$ <sup>PAC</sup> mice.** Experiment was performed based on the description in Figure legend 10. Hepatic gene expression of PPAR $\alpha$  target genes involved in lipid homeostasis (*Pgc1a*, *Cpt1*, *Cyp4a10*, *Cyp4a14*, *Pepck*) were studied using real-time PCR in regenerating WT mice and hPPAR $\alpha$ <sup>PAC</sup> mice with Ad-Control, and hPPAR $\alpha$ <sup>PAC</sup> mice with Ad-Fgf21 injection (A-E). All values represent mean  $\pm$  standard deviation,  $n = 5$ ; \*  $p < 0.05$ , student's  $t$  test, hPPAR $\alpha$ <sup>PAC</sup> with Ad-Fgf21 vs WT with Ad-Control.

a variety of beneficial effects in rodents and nonhuman primates, including reduction of adiposity and alleviation of hyperglycemia, insulin resistance, dyslipidemia, and fatty liver disease [21]. FGF21 deficiency increases the susceptibility of mice to cerulein-induced pancreatitis and toxicity of sepsis, as well as acetaminophen-induced liver injury, suggesting a potentially protective effect of FGF21 against acute organ injury [11,14-16]. Replenishment of FGF21 protects acute liver failure from acetaminophen-induced hepatic ROS accumulation and reverses the abolishment of antioxidant gene expression by increasing PGC1 $\alpha$  [16]. FGF21 regulates energy homeostasis through activation of AMPK and SIRT1 in mice [34]. SIRT1 is implicated in liver regeneration by regulating bile acid metabolism [35]. Published data suggested that FGF21 regulates AMPK through interaction with between ERK1/2 and LKB1 [34], and LKB1/AMPK activation plays a critical role in controlling *Cyclin D* and *Cyclin A* expression [36]. Moreover, ERK1/2 signaling promotes cell proliferation by regulating cell cycle progression during liver regeneration in mice [37]. FGF21 may regulate liver regeneration through these pathways. Additional studies are needed to understand the role of FGF21 in tissue repair and liver regeneration. In addition to PPAR $\alpha$ , FGF21 can be regulated by other nuclear receptors that include the bile acid receptor FXR, retinoic acid receptor, and receptor-related orphan receptor  $\alpha$  [30-33]. It is also possible that these nuclear receptor-mediated signaling pathways were altered in hPPAR $\alpha^{\text{PAC}}$  mice after

PH, a possibility that needs to be explored.

One distinct difference between human and mouse PPAR $\alpha$  is their proliferative effect. Fenofibrate induces hepatocyte proliferation in WT mice, but not in hPPAR $\alpha^{\text{PAC}}$  mice, and a differential regulation of oncogenic *let-7c* by PPAR $\alpha$  accounts for the species difference in proliferation [20]. *Let-7c* is markedly reduced in highly proliferative cancer cells and overexpression of *let-7c* inhibits cancer cell growth [20]. *Let-7c* repression is mouse PPAR $\alpha$ -dependent [20]. Notably, mouse, but not human, PPAR $\alpha$  up-regulates *c-Myc*-induced cell cycle gene expression through *let-7c* inhibition [20]. The expression of *let-7c* levels is reduced 2 hours after PH in rat, suggesting that *let-7c* repression is essential for cell cycle genes induction [38]. The diminished inhibition of *let-7c* and reduced cell cycle gene expressions in regenerating hPPAR $\alpha^{\text{PAC}}$  mouse livers support the view that an inherent difference exists between mouse and human PPAR $\alpha$  in regulating cell proliferation. Forced expression of FGF21 normalized the expression pattern of *let-7c* and *c-Myc* 1-2 days post-PH in hPPAR $\alpha^{\text{PAC}}$  mouse livers. The relationship between FGF21-regulated metabolism and *let-7c/c-Myc*-regulated cell proliferation remains to be established.

PPAR $\alpha$  is a major regulator of BA synthesis [39], and high BAs were persistently present in regenerating hPPAR $\alpha^{\text{PAC}}$  livers. In contrast, WT mice only had a modest and transient increase in hepatic TBA after PH. Dysregulated BA homeostasis was likely the direct cause of liver injury because sustained BA dysregulation was

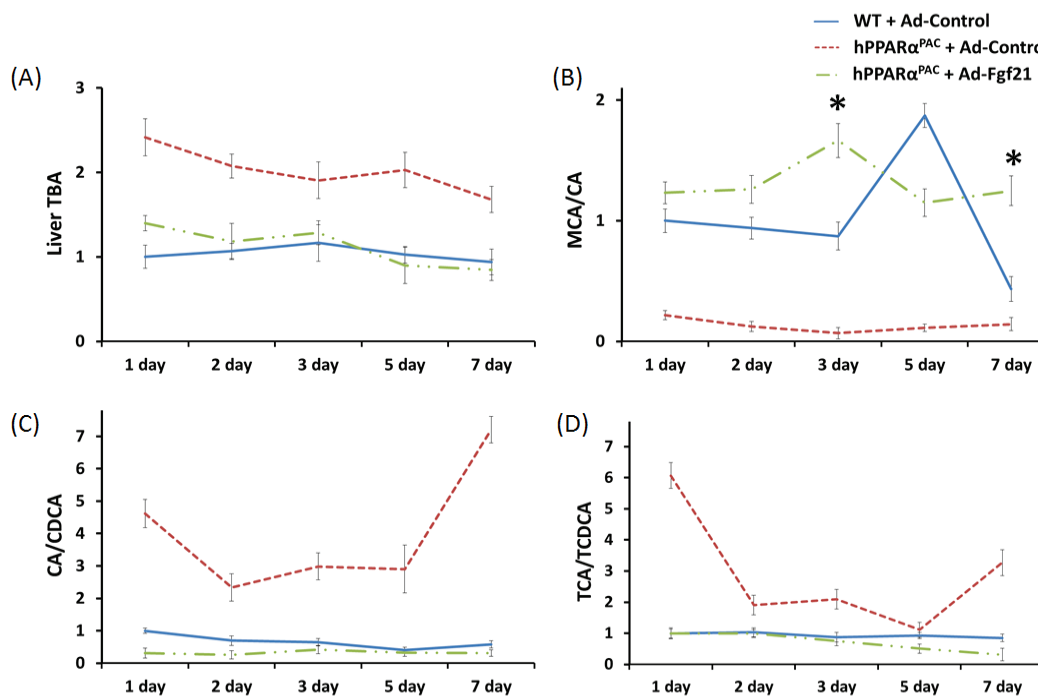

**Figure 14: Adenoviral delivery of Fgf21 reversed the dysregulated bile acid homeostasis in regenerating hPPAR $\alpha^{\text{PAC}}$  mice.** Experiment was performed based on the description in Figure legend 10. Quantification of TBA, CA/CDCA, MCA/CA, and TCA/TCDC ratio from livers that received PH on the basis of mass spectrometry analysis (A-D). All values represent mean  $\pm$  standard deviation,  $n = 5$ ; \*  $p < 0.05$ , student's  $t$  test, hPPAR $\alpha^{\text{PAC}}$  with Ad-Fgf21 vs WT with Ad-Control.

found in regenerating hPPAR $\alpha$ <sup>PAC</sup> mouse livers, which have hepatic injury focused around the periportal area. In addition, the composition of BAs was altered with increased hydrophobicity found in hPPAR $\alpha$ <sup>PAC</sup> mice. Fine-tuning BA levels is essential during liver regeneration to protect hepatocytes from BA-induced toxicity while allowing sufficient BA signaling to stimulate regeneration [17, 18]. PPAR $\alpha$  activation in regulating CYP7A1 and BA homeostasis is controversial. Stimulation of PPAR $\alpha$  by fibrates represses mRNA levels and enzyme activity of human CYP7A1, whereas activation of PPAR $\alpha$  induces mouse *Cyp7a1* transcriptional activity [39]. The differential regulation of the *Cyp7a1* by PPAR $\alpha$  in humans and mice could be a novel species-specific effect. The basal levels of *Cyp7a1/8b1/27a1* expression were similar in both genotypes of mice. However, liver injury and inflammation can inhibit *Cyp7a1* gene expression [40], which might in part responsible for reduced *Cyp7a1* expression in hPPAR $\alpha$ <sup>PAC</sup> mouse livers after PH. *Ostb* mRNA is relatively abundant in human liver, but not in mouse liver and expression of *Ostb* is mainly positively regulated by BAs via the FXR [41]. Enhanced hepatic *Ostb* mRNA and protein is found in patients who have primary biliary cirrhosis and in animal model of cholestasis [41]. Induction of *Ostb* increases bile salt flux and reduces the accumulation of intracellular bile salts [42]. A dramatic induction of *Ostb* mRNA in hPPAR $\alpha$ <sup>PAC</sup> livers after PH suggested increased bile salt burden post-surgery. Enhanced BA levels which resulted from dysregulated expression of genes involved in BA synthesis and transport could also account for periportal pathology found in hPPAR $\alpha$ <sup>PAC</sup> livers after PH.

In conclusion, liver regeneration is impaired in hPPAR $\alpha$ <sup>PAC</sup> mice, which may be partially due to an over-accumulation of lipids and BA. Compared to murine PPAR $\alpha$ , human PPAR $\alpha$  is ineffective in regulating lipid and BA metabolism in response to PH. However, forced expression of FGF21 can reverse this deleterious condition and restore normal liver regeneration programs in hPPAR $\alpha$ <sup>PAC</sup> mice. This finding indicates the importance of FGF21 in liver regeneration and suggests its potential application in promoting hepatic growth in injured and steatotic livers in humans.

## MATERIALS AND METHODS

### Animal

Male WT and hPPAR $\alpha$ <sup>PAC</sup> mice [8] were used for this study. The hPPAR $\alpha$ <sup>PAC</sup> mice, on a *Ppara*-null background, express the human PPAR $\alpha$  gene, and were characterized previously [8]. Mice, 3- to 5-month-old were housed in steel microisolator cages at 22°C with a 12-hr light/dark cycle. Food and water were provided *ad*

*libitum* throughout the study with the exception of fasting experiments. Standard 2/3 PH was performed using the procedure described previously [1, 43, 44]. Mice were killed 3 hours, 1, 1.5, 2, 3, 5, 7 days and 1, 3 months after PH. At least 5 mice were used to study each time point. The liver and body weights at the time of death were recorded to calculate liver-to-body weight ratios. The results obtained were the mean of at least five mice per studied time point. A section of each liver sample was fixed in 10% formalin, embedded in paraffin, and stained for histological analysis. All animal experiments were conducted in accordance with the National Institutes of Health Guide for the Care and Use of Laboratory Animals under protocols approved by the Institutional Animal Care and Use Committee of the University of California, Davis.

### Ki67 immunostaining

Immunostaining with anti-Ki67 antibody (NeoMarkers, Fremont, CA) was performed to monitor cell proliferation. The number of Ki67-labeled cells was counted in six microscopic fields (10X) for each section.

Western blot. Liver protein (40  $\mu$ g) was electrophoresed on SDS-polyacrylamide gels. Proteins from the gels were transferred to the polyvinylidene fluoride membranes. Anti-FGF21, CYCLIN D, CYCLIN E, CYP4A14, and  $\beta$ -actin (Santa Cruz, CA) antibodies were used for detection of proteins.

### Real-time quantitative polymerase chain reaction (qPCR)

Hepatic RNA isolated using TRIzol (Invitrogen, CA) was reverse transcribed to generate cDNA followed by amplification using the ABI Prism 7900HT sequence detection system (Applied Biosystems, CA). Hepatic mRNA levels were normalized based on hepatic *Gapdh* mRNA levels.

### Bile acid quantification

Methanol, water, and formic acid, all of LC/MS grade, were purchased from Fisher Scientific (Santa Clara, CA). CA, DCA, CDCA, UDCA, LCA, glycol and tauro derivatives were purchased from Steraloid Inc. (Newport, RI). Sample preparation was performed based on published methods [45]. The detection of hepatic BAs was carried out on a Prominence™ UFLC system (Shimadzu, Kyoto) coupled to an API 4000 QTRAP™ mass spectrometer (AB Sciex, CA) operated in the negative ionization mode. Chromatography was performed on a Kinetex C<sub>18</sub> column (50 mm X 2.1 mm, 2.6  $\mu$ m) maintained at 40°C preceded by a high pressure column prefilter. The mobile phase consisted of gradient of methanol delivered at a flow

rate of 0.4 ml/min. MS parameters were described in our previous publication [46].

### Forced expression of FGF21 using recombinant adenovirus

Recombinant adenovirus expressing mouse FGF21 was purchased from Vector BioLabs (Vector Biolabs, PA). The adenoviral vector was transfected into a mammalian HEK293T cells to produce large-scale adenovirus [30]. Expression of FGF21 was achieved via tail vein injection [47]. Each mouse received  $7.5 \times 10^9$  particles/g body weight of Ad-Fgf21 or Ad-Control plasmid in 0.1 ml of saline before PH surgery [47].

### Chromatin immunoprecipitation (ChIP) PCR assays

ChIP assays were performed based on previous studies [48, 49]. Briefly, chromatin lysates were cleared before incubation with a ChIP-quality anti-PPAR $\alpha$  antibody (Santa Cruz Biotechnology, Santa Cruz, CA). Antibodies to IgG (Santa Cruz Biotechnology, Santa Cruz, CA) and RNA Polymerase II (Millipore, Billerica, MA) were used as negative and positive controls, respectively. Samples were incubated with Dynase beads at 4°C overnight followed by de-crosslinking and purification. DNA fragments generated served as templates for Real-Time PCR using Power SYBR Green PCR Master Mix.

### Statistical Analysis

Data are given as mean  $\pm$  SD. Statistical analysis was performed using Student's *t* test or one-way analysis of variance. Significance was defined by  $p < 0.05$ .

### ACKNOWLEDGEMENTS

The authors thank Ms. Irene Ly for technical assistance and Ms. Lisa Teixeira for editing the manuscript. This study is supported by grants funded by National Institutes of Health CA53596 and DK092100.

### FINANCIAL SUPPORT

This study is supported by grants funded by National Institutes of Health CA53596 and DK092100.

### CONFLICT OF INTEREST

The authors declare no conflict of interest.

### REFERENCES

1. Liu HX, Fang Y, Hu Y, Gonzalez FJ, Fang J, Wan YJ. PPARbeta Regulates Liver Regeneration by Modulating Akt and E2f Signaling. *PLoS One*. 2013;8:e65644.
2. Gazit V, Huang J, Weymann A, Rudnick DA. Analysis of the role of hepatic PPARgammaexpression during mouse liver regeneration. *Hepatology*. 2012;56:1489-1498.
3. Shteyer E, Liao YJ, Muglia LJ, Hruz PW, Rudnick DA. Disruption of hepatic adipogenesis is associated with impaired liver regeneration in mice. *Hepatology*. 2004;40:1322-1332.
4. Yang SQ, Lin HZ, Mandal AK, Huang JW, Diehl AM. Disrupted signaling and inhibited regeneration in obese mice with fatty livers: Implications for nonalcoholic fatty liver disease pathophysiology. *Hepatology*. 2001;34:694-706.
5. Leclercq IA, Field J, Farrell GC. Leptin-specific mechanisms for impaired liver regeneration in ob/ob mice after toxic injury. *Gastroenterology*. 2003;124:1451-1464.
6. Anderson SP, Yoon L, Richard EB, Dunn CS, Cattley RC, Corton JC. Delayed liver regeneration in peroxisome proliferator-activated receptor-alpha-null mice. *Hepatology*. 2002;36:544-554.
7. Wheeler MD, Smutney OM, Check JF, Rusyn I, Schulte-Hermann R, Thurman RG. Impaired Ras membrane association and activation in PPAR alpha knockout mice after partial hepatectomy. *American Journal of Physiology-Gastrointestinal and Liver Physiology*. 2003;284:G302-G312.
8. Yang Q, Nagano T, Shah Y, Cheung C, Ito S, Gonzalez FJ. The PPAR alpha-humanized mouse: A model to investigate species differences in liver toxicity mediated by PPAR alpha. *Toxicological Sciences*. 2008;101:132-139.
9. Klaunig JE, Babich MA, Baetcke KP, Cook JC, Corton JC, David RM, DeLuca JG, Lai DY, McKee RH, Peters JM, Roberts RA, Fenner-Crisp PA. PPARalpha agonist-induced rodent tumors: modes of action and human relevance. *Crit Rev Toxicol*. 2003;33:655-780.
10. Elias-Miro M, Jimenez-Castro MB, Mendes-Braz M, Casillas-Ramirez A, Peralta C. The Current Knowledge of the Role of PPAR in Hepatic Ischemia-Reperfusion Injury. *Ppar Research*. 2012; 2012:802384.
11. Badman MK, Pissios P, Kennedy AR, Koukos G, Flier JS, Maratos-Flier E. Hepatic fibroblast growth factor 21 is regulated by PPAR alpha and is a key mediator of hepatic lipid metabolism in ketotic states. *Cell Metabolism*. 2007;5:426-437.
12. Owen BM, Ding XS, Morgan DA, Coate KC, Bookout AL, Rahmouni K, Kliewer SA, Mangelsdorf DJ. FGF21 Acts Centrally to Induce Sympathetic Nerve Activity, Energy Expenditure, and Weight Loss. *Cell Metabolism*. 2014;20:670-677.
13. Kliewer SA, Mangelsdorf DJ. Fibroblast growth factor 21:

from pharmacology to physiology. *American Journal of Clinical Nutrition*. 2010;91:254s-257s.

14. Johnson CL, Weston JY, Chadi SA, Fazio EN, Huff MW, Kharitonov A, Koester A, et al. Fibroblast Growth Factor 21 Reduces the Severity of Cerulein-Induced Pancreatitis in Mice. *Gastroenterology*. 2009;137:1795-1804.
15. Feingold KR, Grunfeld C, Heuer JG, Gupta A, Cramer M, Zhang TH, Shigenaga JK, Patzek SM, Chan ZW, Moser A, Bina H, Kharitonov A. FGF21 Is Increased by Inflammatory Stimuli and Protects Leptin-Deficient ob/ob Mice from the Toxicity of Sepsis. *Endocrinology*. 2012;153:2689-2700.
16. Ye DW, Wang YD, Li HT, Jia WP, Man K, Lo CM, Wang Y, Lam KS, Xu A. Fibroblast Growth Factor 21 Protects Against Acetaminophen-Induced Hepatotoxicity by Potentiating Peroxisome Proliferator-Activated Receptor Coactivator Protein-1 alpha-Mediated Antioxidant Capacity in Mice. *Hepatology*. 2014;60:977-989.
17. Huang WD, Ma K, Zhang J, Qatanani M, Cu villier J, Liu J, Dong BN, Huang X, Moore DD. Nuclear receptor-dependent bile acid signaling is required for normal liver regeneration. *Science*. 2006;312:233-236.
18. Pean N, Doignon I, Garcin I, Besnard A, Julien B, Liu BK, Branchereau S, Spraul A, Guettier C, Humbert L, Schoonjans K, Rainteau D, Tordjmann T. The Receptor TGR5 Protects the Liver From Bile Acid Overload During Liver Regeneration in Mice. *Hepatology*. 2013;58:1451-1460.
19. Bai HB, Zhang NL, Xu Y, Chen Q, Khan M, Potter JJ, Nayar SK, Cornish T, Alpini G, Bronk S, Pan D, Anders RA. Yes-associated protein regulates the hepatic response after bile duct ligation. *Hepatology*. 2012;56:1097-1107.
20. Shah YA, Morimura K, Yang Q, Tanabe T, Takagi M, Gonzalez FJ. Peroxisome proliferator-activated receptor alpha regulates a microRNA-mediated signaling cascade responsible for hepatocellular proliferation. *Molecular and Cellular Biology*. 2007;27:4238-4247.
21. Potthoff MJ, Inagaki T, Satapati S, Ding XS, He TT, Goetz R, Mohammadi M, Finck BN, Mangelsdorf DJ, Kliewer SA, Burgess SC. FGF21 induces PGC-1 alpha and regulates carbohydrate and fatty acid metabolism during the adaptive starvation response. *Proc Natl Acad Sci U S A*. 2009;106:10853-10858.
22. Smith JL, Lewindon PJ, Hoskins AC, Pereira TN, Setchell KDR, O'Connell NC, Shepherd RW, Ramm GA. Endogenous ursodeoxycholic acid and cholic acid in liver disease due to cystic fibrosis. *Hepatology*. 2004;39:1673-1682.
23. Huang WM, Gowda M, Donnelly JG. Bile Acid Ratio in Diagnosis of Intrahepatic Cholestasis of Pregnancy. *American Journal of Perinatology*. 2009;26:291-294.
24. Shimada T, Nakanishi T, Toyama A, Yamauchi S, Kanzaki A, Fujiwake H, Sato TA, Ikegawa M. Potential Implications for Monitoring Serum Bile Acid Profiles in Circulation with Serum Proteome for Carbon Tetrachloride-Induced Liver Injury/Regeneration Model in Mice. *Journal of Proteome Research*. 2010;9:4490-4500.
25. Terpstra AHM. Differences between humans and mice in efficacy of the body fat lowering effect of conjugated linoleic acid: Role of metabolic rate. *Journal of Nutrition*. 2001;131:2067-2068.
26. Nagasue N, Yukaya H, Ogawa Y, Kohno H, Nakamura T. Human-Liver Regeneration after Major Hepatic Resection - a Study of Normal Liver and Livers with Chronic Hepatitis and Cirrhosis. *Annals of Surgery*. 1987;206:30-39.
27. Palmer CNA, Hsu MH, Griffin KJ, Raucy JL, Johnson EF. Peroxisome proliferator activated receptor-alpha expression in human liver. *Molecular Pharmacology*. 1998;53:14-22.
28. Rakhshandehroo M, Hooiveld G, Muller M, Kersten S. Comparative analysis of gene regulation by the transcription factor PPARalpha between mouse and human. *PLoS One*. 2009;4:e6796.
29. Oishi K, Shirai H, Ishida N. CLOCK is involved in the circadian transactivation of peroxisome-proliferator-activated receptor alpha (PPAR alpha) in mice. *Biochemical Journal*. 2005;386:575-581.
30. Li Y, Wong K, Walsh K, Gao B, Zang M. Retinoic acid receptor beta stimulates hepatic induction of fibroblast growth factor 21 to promote fatty acid oxidation and control whole-body energy homeostasis in mice. *J Biol Chem*. 2013;288:10490-10504.
31. Badman MK, Pissios P, Kennedy AR, Koukos G, Flier JS, Maratos-Flier E. Hepatic fibroblast growth factor 21 is regulated by PPAR alpha and is a key mediator of hepatic lipid metabolism in ketotic states. *Cell Metab*. 2007;5:426-437.
32. Wang Y, Solt LA, Burris TP. Regulation of FGF21 expression and secretion by retinoic acid receptor-related orphan receptor alpha. *J Biol Chem*. 2010;285:15668-15673.
33. Cyphert HA, Ge X, Kohan AB, Salati LM, Zhang Y, Hillgartner FB. Activation of the farnesoid X receptor induces hepatic expression and secretion of fibroblast growth factor 21. *J Biol Chem*. 2012;287:25123-25138.
34. Chau MD, Gao J, Yang Q, Wu Z, Gromada J. Fibroblast growth factor 21 regulates energy metabolism by activating the AMPK-SIRT1-PGC-1alpha pathway. *Proc Natl Acad Sci U S A*. 2010;107:12553-12558.
35. García-Rodríguez JL, Barbier-Torres L, Fernández-Álvarez S, Gutiérrez-de Juan V, Monte MJ, Halilbasic E, Herranz D, Álvarez L, Aspichueta P, Marín JJ, Trauner M, Mato JM, Serrano M, Beraza N, Martínez-Chantar ML. SIRT1 controls liver regeneration by regulating bile acid metabolism through farnesoid X receptor and mammalian target of rapamycin signaling. *Hepatology*. 2014;59:1972-1983.
36. Varela-Rey M, Beraza N, Lu SC, Mato JM, Martínez-

- Chantar ML. Role of AMP-activated protein kinase in the control of hepatocyte priming and proliferation during liver regeneration. *Exp Biol Med*. 2011;236:402-408.
37. Kong B, Huang J, Zhu Y, Li G, Williams J, Shen S, Aleksunes LM, Richardson JR, Apte U, Rudnick DA, Guo GL. *Am J Physiol Gastrointest Liver Physiol*. 2014;306:G893-902.
  38. Raschzok N, Werner W, Sallmon H, Billecke N, Dame C, Neuhaus P, Sauer IM. Temporal expression profiles indicate a primary function for microRNA during the peak of DNA replication after rat partial hepatectomy. *American Journal of Physiology-Regulatory Integrative and Comparative Physiology*. 2011;300:R1363-R1372.
  39. Li TG, Chiang JYL. Regulation of Bile Acid and Cholesterol Metabolism by PPARs. *Ppar Research* 2009;2009:501739.
  40. Henkel AS, Anderson KA, Dewey AM, Kavesh MH, Green RM. A chronic high-cholesterol diet paradoxically suppresses hepatic CYP7A1 expression in FVB/NJ mice. *Journal of Lipid Research*. 2011;52:289-298.
  41. Landrier JF, Eloranta JJ, Vavricka SR, Kullak-Ublick GA. The nuclear receptor for bile acids, FXR, transactivates human organic solute transporter-alpha and -beta genes. *American Journal of Physiology-Gastrointestinal and Liver Physiology*. 2006;290:G476-G485.
  42. Wagner M, Fickert P, Zollner G, Fuchsbichler A, Silbert D, Tsybrovskyy O, Zatloukal K, Guo GL, Schuetz JD, Gonzalez FJ, Marschall HU, Denk H, Trauner M. Role of farnesoid X receptor in determining hepatic ABC transporter expression and liver injury in bile duct-ligated mice. *Gastroenterology*. 2003;125:825-838.
  43. Dai GL, He L, Bu PL, Wan YJY. Pregnane X receptor is essential for normal progression of liver regeneration. *Hepatology*. 2008;47:1277-1287.
  44. Yang XX, Guo ML, Wan YJY. Deregulation of Growth Factor, Circadian Clock, and Cell Cycle Signaling in Regenerating Hepatocyte RXR alpha-Deficient Mouse Livers. *American Journal of Pathology*. 2010;176:733-743.
  45. Garcia-Canaveras JC, Donato MT, Castell JV, Lahoz A. Targeted profiling of circulating and hepatic bile acids in human, mouse, and rat using a UPLC-MRM-MS-validated method. *Journal of Lipid Research*. 2012;53:2231-2241.
  46. Yang F, Xu Y, Xiong AZ, He YG, Yang L, Wan YJY, Wang ZT. Evaluation of the protective effect of Rhei Radix et Rhizoma against alpha-naphthylisothiocyanate induced liver injury based on metabolic profile of bile acids. *Journal of Ethnopharmacology*. 2012;144:599-604.
  47. Inagaki T, Dutchak P, Zhao G, Ding X, Gautron L, Parameswara V, Li Y, Goetz R, Mohammadi M, Esser V, Elmquist JK, Gerard RD, Burgess SC, Hammer RE, Mangelsdorf DJ, Kliewer RA. Endocrine regulation of the fasting response by PPARalpha-mediated induction of fibroblast growth factor 21. *Cell Metab*. 2007;5:415-425.
  48. Yang F, He YQ, Liu HX, Tsuei J, Jiang XY, Yang L, Wang ZT, Wan YJY. All-trans retinoic acid regulates hepatic bile acid homeostasis. *Biochemical Pharmacology*. 2014;91:483-489.
  49. Hu Y, Liu HX, He YQ, Fang YP, Fang JW, Wan YJY. Transcriptome profiling and genome-wide DNA binding define the differential role of fenretinide and all-trans RA in regulating the death and survival of human hepatocellular carcinoma Huh7 cells. *Biochemical Pharmacology*. 2013;85:1007-1017.
